# Supplementary material
Source: PubMed Central journal article supplement (PMC4694609)
Supplement: chest_143_5S_e121S_ds01.pdf [file chest_143_5S_e121S_ds01.pdf]

## **Clinical and Organizational Factors in the Initial Evaluation of Patients with Lung Cancer**

### **Diagnosis and Management of Lung Cancer, 3rd ed: American College of Chest Physicians Evidence-Based Clinical Practice Guidelines**

*David E. Ost, MD, MPH; Sai-Jing Yeung, MD, PhD; Lynn Tanoue, MD; and Michael K. Gould, MD*

**Affiliations:** from The University of Texas MD Anderson Cancer Center, Department of Pulmonary Medicine (Dr Ost) and Department of Endocrinology (Dr Yeung); Department of Pulmonary and Critical Care Medicine (Dr Tanoue), Yale University, New Haven, CT; and Department of Research and Evaluation (Dr Gould), Kaiser Permanente Southern California,

**Funding/Support:**

**Disclaimer:** American College of Chest Physician guidelines are intended for general information only, are not medical advice, and do not replace professional medical care and physician advice, which always should be sought for any medical condition. The complete disclaimer for this guideline can be accessed at <http://chestjournal.chestpubs.org/content/XXX>.

**Correspondence to:** David Ost, MD, 1515 Holcombe Blvd, Unit 1462, Houston, Tx 77030-4009; e-mail: [dost@mdanderson.org](mailto:dost@mdanderson.org)

#### 1.0 METHODS

To evaluate the timeliness of care and lung cancer outcomes, we searched MEDLINE and the Cochrane Database of Systematic Reviews from 1965 to June 2011, by using the following keywords and MeSH terms: lung neoplasms, lung cancer, time management, time factors, waiting lists, timeliness, delay, survival, survival analysis, survival rate, mortality, neoplasm staging, prognosis, anxiety, depression, costs and cost analysis, and cost-benefit analysis. We also searched our own files and scanned reference lists of review articles and included reports. Our search identified 1998 studies, 130 of which were determined to be potentially relevant after scanning titles and abstracts. Of these, 8 studies described one or more time intervals for lung cancer care in a U.S. clinical setting, 18 studies examined the association between timeliness and survival or another outcome, and 6 studies reported an intervention to improve timeliness of care or surgical resection rates (Table 1S).

To evaluate whether multidisciplinary team management, as compared to conventional care, improved survival in patients with known or suspected lung cancer, we conducted an electronic search to identify all human studies from May 2005 to July 2010 using the search term keywords and combinations of “lung cancer”, “multidisciplinary”, “team approach” or “management”. A single reviewer screened all titles and abstracts, identifying potentially relevant articles for full text retrieval. Exclusion criteria included failure to use a multidisciplinary team, failure to have a non-multidisciplinary team control arm, failure to measure impact on survival, failure to deal with lung cancer patients specifically. Review of the full text articles was then conducted. The references of the retrieved articles were also screened

and relevant review articles were searched to identify additional reports. Findings were reviewed and approved by the members of the chapter writing committee. There were 31 studies identified, and of these 14 studies were pulled for full text review. An additional 18 studies were identified through reference review.<sup>1-21</sup> One abstract and one letter<sup>14</sup> were excluded. In the remaining studies there was too much clinical heterogeneity in terms of the participants, outcomes, and comparators to statistically pool the results. These results are similar to a previously published systematic review.<sup>22</sup> A flow diagram is shown in Figure 1S.

## REFERENCES

1. Bowen EF, Anderson JR, Roddie ME. Improving surgical resection rates in lung cancer without a two stop service. *Thorax*. 2003;58(4):368.
2. Bydder S, Nowak A, Marion K, Phillips M, Atun R. The impact of case discussion at a multidisciplinary team meeting on the treatment and survival of patients with inoperable non-small cell lung cancer. *Intern Med J*. 2009;39(12):838-841.
3. Conron M, Phuah S, Steinfort D, Dabscheck E, Wright G, Hart D. Analysis of multidisciplinary lung cancer practice. *Intern Med J*. 2007;37(1):18-25.
4. Davison AG, Eraut CD, Haque AS, et al. Telemedicine for multidisciplinary lung cancer meetings. *J Telemed Telecare*. 2004;10(3):140-143.
5. Dedes KJ, Szucs TD, Bodis S, et al. Management and costs of treating lung cancer patients in a university hospital. *Pharmacoeconomics*. 2004;22(7):435-444.
6. Deegan PC, Heath L, Brunskill J, Kinnear WJ, Morgan SA, Johnston ID. Reducing waiting times in lung cancer. *J R Coll Physicians Lond*. 1998;32(4):339-343.
7. Dillman RO, Chico SD. Cancer patient survival improvement is correlated with the opening of a community cancer center: comparisons with intramural and extramural benchmarks. *J Oncol Pract*. 2005;1(3):84-92.
8. Forrest LM, McMillan DC, McArdle CS, Dunlop DJ. An evaluation of the impact of a multidisciplinary team, in a single centre, on treatment and survival in patients with inoperable non-small-cell lung cancer. *Br J Cancer*. 2005;93(9):977-978.
9. Free CM, Ellis M, Beggs L, Beggs D, Morgan SA, Baldwin DR. Lung cancer outcomes at a UK cancer unit between 1998-2001. *Lung Cancer*. 2007;57(2):222-228.
10. Kee F, Owen T, Leathem R. Decision making in a multidisciplinary cancer team: does team discussion result in better quality decisions? *Med Decis Making*. 2004;24(6):602-613.
11. Kee F, Owen T, Leathem R. Offering a prognosis in lung cancer: when is a team of experts an expert team? *J Epidemiol Community Health*. 2007;61(4):308-313.
12. Laroche C, Wells F, Coulden R, et al. Improving surgical resection rate in lung cancer. *Thorax*. 1998;53(6):445-449.
13. Leo F, Venissac N, Poudenx M, Otto J, Mouroux J. Multidisciplinary management of lung cancer: how to test its efficacy? *J Thorac Oncol*. 2007;2(1):69-72.
14. Magee LR, Laroche CM, Gilligan D. Clinical trials in lung cancer: evidence that a programmed investigation unit and a multidisciplinary clinic may improve recruitment. *Clin Oncol (R Coll Radiol)*. 2001;13(4):310-311.

15. Martin-Ucar AE, Waller DA, Atkins JL, Swinson D, O'Byrne KJ, Peake MD. The beneficial effects of specialist thoracic surgery on the resection rate for non-small-cell lung cancer. *Lung Cancer*. 2004;46(2):227-232.
16. Murray PV, O'Brien ME, Sayer R, et al. The pathway study: results of a pilot feasibility study in patients suspected of having lung carcinoma investigated in a conventional chest clinic setting compared to a centralised two-stop pathway. *Lung Cancer*. 2003;42(3):283-290.
17. Price A, Kerr GR, Gregor A, J. I, Little F. Abstracts of the 21st Annual European Society for Therapeutic Radiology and Oncology Meeting. Praha, Czech Republic, 17-21 September 2002. *Radiother Oncol*. Vol 64 Suppl 1. 2002/12/20 ed2002:S80.
18. Riedel RF, Wang X, McCormack M, et al. Impact of a multidisciplinary thoracic oncology clinic on the timeliness of care. *J Thorac Oncol*. 2006;1(7):692-696.
19. Seek A, Hogle WP. Modeling a better way: navigating the healthcare system for patients with lung cancer. *Clin J Oncol Nurs*. 2007;11(1):81-85.
20. Stevens W, Stevens G, Kolbe J, Cox B. Management of stages I and II non-small-cell lung cancer in a New Zealand study: divergence from international practice and recommendations. *Intern Med J*. 2008;38(10):758-768.
21. Wong S, Rosenthal MA, deBoer R, Green MD, Fox RM. Five years managing metastatic non-small cell lung cancer: experience at a teaching hospital. *Intern Med J*. 2004;34(8):458-463.
22. Coory M, Gkolia P, Yang IA, Bowman RV, Fong KM. Systematic review of multidisciplinary teams in the management of lung cancer. *Lung Cancer*. 2008;60(1):14-21.

FIGURE 1S. [Section 5.0, Online Supplement]. Flow Diagram: Evaluating whether multidisciplinary team management as compared to conventional care improves survival.

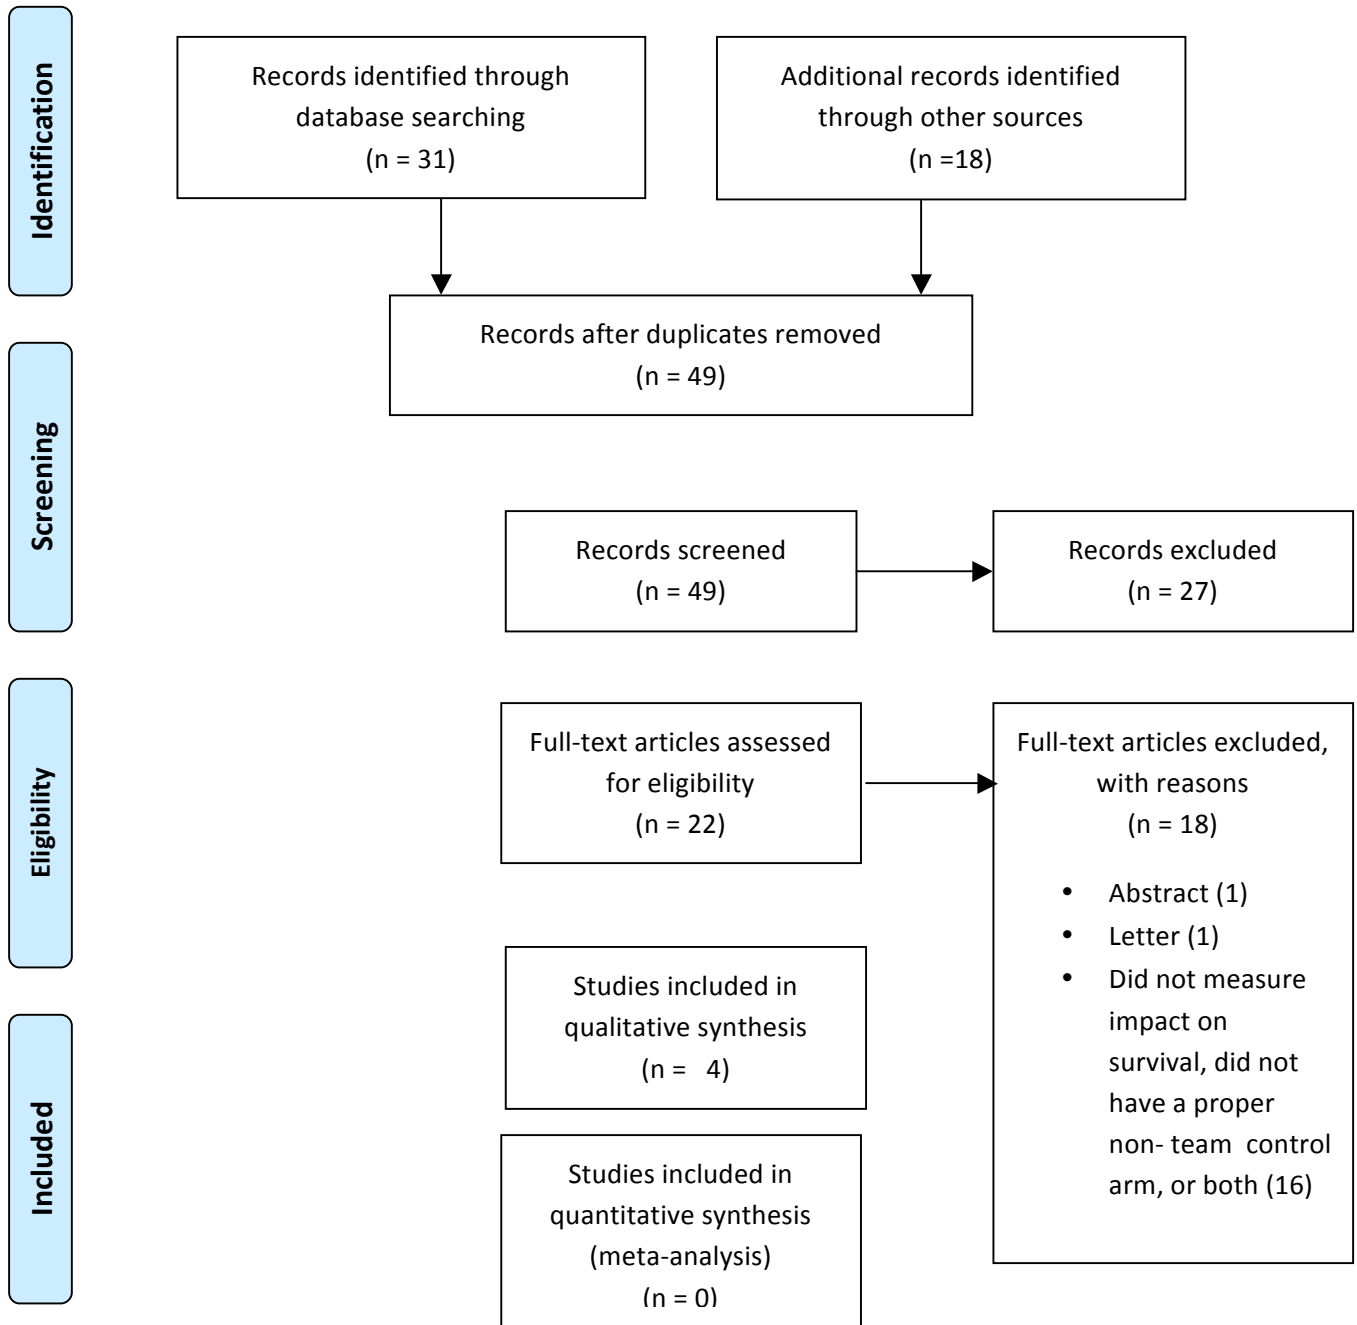

**Table 1S—[Section 1.0] Structured Clinical Questions**

| <b>Section</b> | <b>Patient Population</b>                                 | <b>Intervention</b>         | <b>Comparator</b>              | <b>Outcome</b>              | <b>Methods</b>                                           |
|----------------|-----------------------------------------------------------|-----------------------------|--------------------------------|-----------------------------|----------------------------------------------------------|
| 4.4            | Patients with known or suspected lung cancer              | Timeliness of care          | Less timely care               | Response Rates and Survival | RCTs, Case control, Retrospective and prospective cohort |
| 5.1            | Patients with lung cancer requiring multimodality therapy | Multidisciplinary team care | No multidisciplinary team care | Survival                    | RCTs, Case control, Retrospective and prospective cohort |

Table E-2. Studies of the association between timeliness of care and outcomes: methods and patient characteristics

| Author, year                       | Risk of bias  |                         |                                      | Patient characteristics                                                              |                                                                                                                                                                               |             |                                                            |               |                                                                                             |
|------------------------------------|---------------|-------------------------|--------------------------------------|--------------------------------------------------------------------------------------|-------------------------------------------------------------------------------------------------------------------------------------------------------------------------------|-------------|------------------------------------------------------------|---------------|---------------------------------------------------------------------------------------------|
|                                    | Prospective?  | Consecutive enrollment? | Adjustment for baseline differences? | Covariates                                                                           | Inclusion criteria                                                                                                                                                            | Subjects, N | Age (yrs)                                                  | % men         | Follow-up duration                                                                          |
| Annakaya, <sup>1</sup> 2007        | Yes           | Not specified           | Yes                                  | Tumor stage, tumor invasion, lymph node involvement, and presence of metastasis.     | Lung cancer. Patients not admitted to hospital were excluded.                                                                                                                 | 103         | Median 63, Range 37-82                                     | 93            | Mean 7.4±8.7 months, Median 6 months, Range 1-54 months                                     |
| Aragoneses, <sup>2</sup> 2002      | No            | Yes                     | Yes                                  | Age, histology, clinical and pathological stage                                      | Surgically resected stage I and II NSCLC. Patients with no preoperative diagnosis, stage III and IV, and those not operated on within 154 days after diagnosis were excluded. | 1082        | Median 65, Range 32-87                                     | Not specified | Not specified                                                                               |
| Berthelet, <sup>3</sup> 2006       | No            | Not specified           | Yes                                  | Performance status, serum LDH levels, pleural effusion and chemotherapy.             | Limited SCLC                                                                                                                                                                  | 166         | Median 68, Range 35-86                                     | 44            | Median 52 months, Range 10-92 months                                                        |
| Bozcuk, <sup>4</sup> 2001          | No            | Not specified           | Yes                                  | Demographics, histology, performance status, weight loss, labs, referral, treatment. | NSCLC (170); unknown histology (19)                                                                                                                                           | 189         | Median 70, Range 37-89                                     | 71            | NS                                                                                          |
| Bryant, <sup>5</sup> 2008          | Yes           | Yes                     | Yes                                  | Age, sex, hx of smoking                                                              | NSCLC (biopsy proven and clinically staged using CT/PET) and underwent complete resection and had a complete thoracic lymphadenectomy.                                        | 762         | Median: <45 group 42; >45 group 68                         | 60            | Median 3.9 years                                                                            |
| Buccheri, <sup>6</sup> 2004        | Yes           | Yes                     | Yes                                  | Performance status, stage, chest infection, cough, weight loss, bloody sputum.       | Cytologically or histologically proven lung cancer.                                                                                                                           | 1277        | Median 66, Range 32-90                                     | 86            | 31 weeks                                                                                    |
| Comber, <sup>7</sup> 2005          | Not specified | Not specified           | Yes                                  | Tumor size, age, and sex.                                                            | All incident cases of lymphomas, breast, lung, prostate, and colorectal cancers in Ireland in 1999.                                                                           | 2424        | Not specified                                              | Not specified | Not specified                                                                               |
| Gould, <sup>8</sup> 2008           | No            | Yes                     | Yes                                  | Age, gender, race/ethnicity, stage, histology, and treatment                         | NSCLC                                                                                                                                                                         | 129         | Mean 67                                                    | 98            | Median 270 days from the date of initial suspicion and 147 days from the date of treatment. |
| Kanashiki, <sup>9</sup> 2003       | No            | Not specified           | No                                   |                                                                                      | Patients with lung cancer detected through mass screening.                                                                                                                    | 83          | Age <70 (27) and ≥ 70 (56)                                 | 57            | Not specified                                                                               |
| Kashiwabara, <sup>10</sup> 2002    | Not specified | Not specified           | No                                   |                                                                                      | Asymptomatic patients with lung cancer found by mass screening and who had undergone mass screening chest roentgenograms one year before the disease was found.               | 143         | Mean: Control group 68.3, Delayed group 70.3               | 64            | Not specified                                                                               |
| Kashiwabara, <sup>11</sup> 2003    | Not specified | Not specified           | Yes                                  | Tumor size; Pathological type, TNM classification                                    | Asymptomatic patients with lung cancer found by mass screening and who had undergone mass screening chest roentgenograms one year before the disease was found.               | 198         | Mean: Males 70.3, Females 69.3                             | 69            | Not specified                                                                               |
| Lieberman, <sup>12</sup> 2006      | No            | Not specified           | Yes                                  | Presenting symptom, procedure, tumor                                                 | NSCLC patients who had undergone surgical resection or biopsy for lung pathology, TNM classification.                                                                         | 256         | Mean 65.3                                                  | 61            | Not specified                                                                               |
| Loh, <sup>13</sup> 2006            | No            | Not specified           | No                                   | No                                                                                   | NSCLC patients                                                                                                                                                                | 122         | Not specified                                              | Not specified | Not specified                                                                               |
| Myrdal, <sup>14</sup> 2004         | No            | Not specified           | Yes                                  | Sex, age, histology, type of treatment                                               | NSCLC patients who received treatment with surgery, chemotherapy, or radiation.                                                                                               | 466         | Males: Mean 66, Range 44-86; Females: Mean 64, Range 39-89 | 58            | 20.4 months.                                                                                |
| Pita-Fernandez, <sup>15</sup> 2003 | No            | Not specified           | Yes                                  | Age, sex, TNM stage, and small-cell histology.                                       | Cytohologically confirmed lung cancer.                                                                                                                                        | 378         | Mean 66, Median 66, Range 31-90.                           | 96            | Mean 12.4 months, Median 6.5 months.                                                        |
| Quarterman, <sup>16</sup> 2003     | No            | Not specified           | No                                   |                                                                                      | Patients who underwent surgical intervention for pathologic stage I or II NSCLC.                                                                                              | 84          | Mean 66                                                    | 95            | Median 3.3 years                                                                            |
| Ringbaek, <sup>17</sup> 1999       | No            | Yes                     | Yes                                  | Gender, tumor stage, histology, and treatment.                                       | Patients with cancer-suspect lesions.                                                                                                                                         | 467         | Mean 78                                                    | 64            | Median 1 year                                                                               |
| Salomaa, <sup>18</sup> 2005        | No            | Not specified           | Yes                                  | Age, gender, histology, stage, treatment, delay in specialist therapy.               | Lung cancer                                                                                                                                                                   | 132         | Mean 69                                                    | 72            | Not specified                                                                               |

## **References:**

1. Annakkaya AN, Arbak P, Balbay O, et al. Effect of symptom-to-treatment interval on prognosis in lung cancer. *Tumori* 2007; 93:61-67
2. Aragonese FG, Moreno N, Leon P, et al. Influence of delays on survival in the surgical treatment of bronchogenic carcinoma. *Lung Cancer* 2002; 36:59-63
3. Berthelet E, Truong PT, Lesperance M, et al. Examining time intervals between diagnosis and treatment in the management of patients with limited stage small cell lung cancer. *American Journal of Clinical Oncology* 2006; 29:21-26
4. Bozcuk H, Martin C. Does treatment delay affect survival in non-small cell lung cancer? A retrospective analysis from a single UK centre. *Lung Cancer* 2001; 34:243-252
5. Bryant AS, Cerfolio RJ. Differences in outcomes between younger and older patients with non-small cell lung cancer. *Ann Thorac Surg* 2008; 85:1735-1739; discussion 1739
6. Buccheri G, Ferrigno D. Lung cancer: clinical presentation and specialist referral time. *Eur Respir J* 2004; 24:898-904
7. Comber H, Cronin DP, Deady S, et al. Delays in treatment in the cancer services: impact on cancer stage and survival. *Irish Medical Journal* 2005; 98:238-239
8. Gould MK, Ghaus SJ, Olsson JK, et al. Timeliness of care in veterans with non-small cell lung cancer. *Chest* 2008; 133:1167-1173
9. Kanashiki M, Satoh H, Ishikawa H, et al. Time from finding abnormality on mass-screening to final diagnosis of lung cancer. *Oncology Reports* 2003; 10:649-652
10. Kashiwabara K, Koshi S, Ota K, et al. Outcome in patients with lung cancer found retrospectively to have had evidence of disease on past lung cancer mass screening roentgenograms. *Lung Cancer* 2002; 35:237-241
11. Kashiwabara K, Koshi S, Itonaga K, et al. Outcome in patients with lung cancer found on lung cancer mass screening roentgenograms, but who did not subsequently consult a doctor. *Lung Cancer* 2003; 40:67-72
12. Liberman M, Liberman D, Sampalis JS, et al. Delays to surgery in non-small-cell lung cancer. *Can J Surg* 2006; 49:31-36
13. Loh LC, Chan LY, Tan RY, et al. Time delay and its effect on survival in Malaysian patients with non-small cell lung carcinoma. *Malays J Med Sci* 2006; 13:37-42
14. Myrdal G, Lambe M, Hillerdal G, et al. Effect of delays on prognosis in patients with non-small cell lung cancer. *Thorax* 2004; 59:45-49
15. Pita-Fernandez S, Montero-Martinez C, Pertega-Diaz S, et al. Relationship between delayed diagnosis and the degree of invasion and survival in lung cancer. *Journal of Clinical Epidemiology* 2003; 56:820-825
16. Quarterman RL, McMillan A, Ratcliffe MB, et al. Effect of preoperative delay on prognosis for patients with early stage non-small cell lung cancer. *Journal of Thoracic and Cardiovascular Surgery* 2003; 125:108-114
17. Ringbaek T, Borgeskov S, Lange P, et al. Diagnostic and therapeutic process and prognosis in suspected lung cancer. *Scandinavian Cardiovascular Journal* 1999; 33:337-343
18. Salomaa ER, Sallinen S, Hiekkanen H, et al. Delays in the diagnosis and treatment of lung cancer. *Chest* 2005; 128:2282-2288

**Table E-3. Studies of the association between timeliness of care and outcomes: results**

| Author, year                       | Subgroups              | Time intervals                                                                                                                                                                                      | Outcome(s)                                                       | Metric                                 | Results                                                                                                                                                          |
|------------------------------------|------------------------|-----------------------------------------------------------------------------------------------------------------------------------------------------------------------------------------------------|------------------------------------------------------------------|----------------------------------------|------------------------------------------------------------------------------------------------------------------------------------------------------------------|
| Annakaya, <sup>1</sup> 2007        | All NSCLC              | Symptom to treatment (≤60 days vs. >60 days)                                                                                                                                                        | Survival                                                         | Median                                 | 7 vs. 11 months, p=0.015                                                                                                                                         |
|                                    | SCLC                   |                                                                                                                                                                                                     | Survival                                                         | Median                                 | 6 vs. 11 months, p=0.032                                                                                                                                         |
|                                    | All NSCLC              |                                                                                                                                                                                                     | Survival                                                         | Median                                 | 8 vs. 11 months, p=0.765                                                                                                                                         |
| Aragoneses, <sup>2</sup> 2002      | All NSCLC              | Pathological diagnosis to surgery, days                                                                                                                                                             | Survival                                                         | Hazard ratio                           | Not significant                                                                                                                                                  |
|                                    | SCLC                   | Pathological diagnosis to surgery (1-20 vs. 21-40; 1-20 vs 41-60; 1-20 vs. >60 days)                                                                                                                | Survival                                                         | Hazard ratio                           | Not significant                                                                                                                                                  |
|                                    | SCLC                   | Pathological diagnosis to surgery (1-20 vs. 21-40; 1-20 vs 41-60; 1-20 vs. >60 days)                                                                                                                | Survival                                                         | Hazard ratio                           | Not significant                                                                                                                                                  |
| Berthelet, <sup>3</sup> 2006       |                        | Abnormal chest x-ray to pathological diagnosis (>20 days vs. <20 days)                                                                                                                              | Complete response                                                | Odds ratio                             | 3.6 (1.1 to 11.3)                                                                                                                                                |
|                                    |                        | Pathological diagnosis to first oncology consult (>12 days vs. <12 days)                                                                                                                            | Complete response                                                | Odds ratio                             | 0.35 (0.11 to 1.1)                                                                                                                                               |
|                                    |                        | Oncology consult to thoracic radiation (>63.5 days vs. <63.5 days)                                                                                                                                  | Complete response                                                | Odds ratio                             | 0.45 (0.07 to 3.1)                                                                                                                                               |
|                                    |                        | Chemotherapy to thoracic radiation (>48 days vs. <48 days)                                                                                                                                          | Complete response                                                | Odds ratio                             | 0.44 (0.07 to 2.7)                                                                                                                                               |
| Bozcuk, <sup>4</sup> 2001          | Stages I and II        | Receipt of referral letter to first treatment (log transformed days).                                                                                                                               | Survival                                                         | Hazard ratio                           | Unadjusted HR 0.43, p=0.28                                                                                                                                       |
|                                    | Stage III              |                                                                                                                                                                                                     | Survival                                                         | Hazard ratio                           | Unadjusted HR 1.3, p=0.55                                                                                                                                        |
|                                    | Stage IV               |                                                                                                                                                                                                     | Survival                                                         | Hazard ratio                           | Unadjusted HR 0.67, p=0.22                                                                                                                                       |
| Bryant, <sup>5</sup> 2008          |                        | Initial symptom or incidental finding to surgery                                                                                                                                                    | Survival                                                         | Median                                 | p = 0.023                                                                                                                                                        |
|                                    |                        | Initial symptom or incidental finding to surgery                                                                                                                                                    | Survival                                                         | Hazard ratio                           | Not significant.                                                                                                                                                 |
| Buccheri, <sup>6</sup> 2004        |                        | First symptom to specialist referral, months                                                                                                                                                        | Symptoms                                                         | Median                                 | Late referral associated with cough, systemic symptoms, poor performance status, weight loss, LDH, advanced stage and less effective treatment (p<0.001 for all) |
|                                    |                        | First symptom to specialist referral (≤2 months vs >2 months)                                                                                                                                       | Survival                                                         | Median                                 | 43.4 months vs. 31.9 months, p<0.01                                                                                                                              |
|                                    |                        | First symptom to specialist referral (≤2 months vs >2 months)                                                                                                                                       | Survival                                                         | Hazard ratio                           | Not significant                                                                                                                                                  |
| Comber, <sup>7</sup> 2005          |                        | Time to treatment                                                                                                                                                                                   | Survival                                                         | Hazard ratio (referent group <1 month) | 0.67 (1-2 months), 0.36 (2-3 months), 0.49 (3-4 months), 0.45 (4-5 months), 0.39 (>5 months).                                                                    |
| Gould, <sup>8</sup> 2008           |                        | Initial suspicion to treatment (<84 days vs. >84 days)                                                                                                                                              | Mortality                                                        | Percent                                | 55% vs. 80%, p=0.003                                                                                                                                             |
|                                    | Solitary nodule (n=23) |                                                                                                                                                                                                     | Survival                                                         | Hazard ratio                           | 1.6 (1.3 to 1.9)                                                                                                                                                 |
|                                    |                        |                                                                                                                                                                                                     | Survival                                                         | 2-year                                 | Percent                                                                                                                                                          |
| Kanashiki, <sup>9</sup> 2003       |                        | Mass-screening to final diagnosis (≤ 4 months vs. >4 months)                                                                                                                                        | Survival                                                         | Median                                 | p=0.049                                                                                                                                                          |
| Kashiwabara, <sup>10</sup> 2002    |                        | One year delayed detection of lung cancer on mass screening                                                                                                                                         | Survival                                                         | 5-year                                 | 58% (controls) vs. 46% (delayed group), P=0.13.                                                                                                                  |
| Kashiwabara, <sup>11</sup> 2003    |                        | Comparison of those who consulted a doctor when abnormal shadows were detected on chest roentgenograms (controls) and those who did not consult a doctor for at least 1 year (delayed consultation) | Survival                                                         | Hazard ratio                           | 2.15 (1.2 to 3.8), P=0.01 (delayed consultation vs. controls)                                                                                                    |
|                                    |                        |                                                                                                                                                                                                     | Survival                                                         | 5-year                                 | 21% (delayed consultation) vs. 51% (controls), P=0.0003.                                                                                                         |
| Liberman, <sup>12</sup> 2006       |                        | Symptom onset or physician visit to surgery                                                                                                                                                         | TNM stage I or II (vs. III or IV)                                | Odds ratio                             | 1.00 (0.999 to 1.001)                                                                                                                                            |
|                                    |                        | First contact with thoracic surgeon to surgery                                                                                                                                                      | TNM stage I or II (vs. III or IV)                                | Odds ratio                             | 1.00 (0.997 to 1.002)                                                                                                                                            |
| Loh, <sup>13</sup> 2006            |                        | Symptom onset to first hospital consultation (<3 months, 3 to 6 months, and >6 months)                                                                                                              | Survival                                                         | Median                                 | 4.1 (9.9 to 1.7) versus 5.1 (10.9 to 3.2) versus 5.7 (12.3 to 2.1) months.                                                                                       |
|                                    |                        | Hospital consultation to treatment or decision to treat (<30 days, 30-60 days, and >60 days)                                                                                                        | Survival                                                         | Median                                 | 4.1 (10.8 to 1.8) vs. 7.6 (13.7 to 3.2) vs. 5.3 (16.0 to 3.0) months.                                                                                            |
| Myrdal, <sup>14</sup> 2004         |                        | Symptom to treatment (<3 months, 3-6 months, >6 months)                                                                                                                                             | Survival                                                         | 3-year                                 | 11% (5% to 17%) vs. 31% (23% to 39%) vs. 35% (26% to 43%).                                                                                                       |
|                                    |                        | Symptom to treatment, days                                                                                                                                                                          | Survival                                                         | Hazard ratio                           | 0.79 (0.61 to 0.97)                                                                                                                                              |
|                                    |                        | First hospital visit to start of treatment (<1 month, 1-2 months, 2-3 months, and >3 months)                                                                                                        | Survival                                                         | 3-year                                 | 19% (12% to 28%), 34% (26% to 41%), 36% (25% to 46%), and 43% (31% to 55%).                                                                                      |
|                                    |                        | First hospital visit to start of treatment, days                                                                                                                                                    | Survival                                                         | Hazard ratio                           | 0.87 (0.75 to 1.00)                                                                                                                                              |
| Pita-Fernandez, <sup>15</sup> 2003 |                        | Symptom to diagnosis, months                                                                                                                                                                        | Survival                                                         | Hazard ratio                           | 1.01 (0.94 to 1.08)                                                                                                                                              |
|                                    | SCLC                   | Symptom to diagnosis, months                                                                                                                                                                        | Survival                                                         | Hazard ratio                           | 1.01 (0.75 to 1.35)                                                                                                                                              |
| Quarterman, <sup>16</sup> 2003     |                        | Initial detection to surgery, days                                                                                                                                                                  | Survival (from surgical intervention to death or last follow-up) | Hazard ratio                           | 1.06 (0.87 to 1.30) for each 90 day increment                                                                                                                    |
|                                    |                        | Initial detection to surgery (≤ 90 days and > 90 days)                                                                                                                                              | Survival (from surgical intervention to death or last follow-up) | Median                                 | P=0.78                                                                                                                                                           |
|                                    |                        | Initial detection to surgery, days                                                                                                                                                                  | Survival (from date of presentation to death or last follow-up)  | Hazard ratio                           | HR 0.87 (0.47-1.61) for each 90-day increment                                                                                                                    |
|                                    |                        | Initial detection to surgery (≤ 90 days and > 90 days)                                                                                                                                              | Survival (from date of presentation to death or last follow-up)  | Median                                 | P=0.45                                                                                                                                                           |
|                                    |                        | Initial detection to surgery, days                                                                                                                                                                  | Cancer-related survival (from the date of surgical intervention) | Median                                 | P=0.64                                                                                                                                                           |
|                                    |                        | Initial detection to surgery (≤ 90 days and > 90 days)                                                                                                                                              | Cancer-related survival (from the date of surgical intervention) | Median                                 | P=0.23                                                                                                                                                           |
| Ringbaek, <sup>17</sup> 1999       |                        | Time to operation (from initial referral?)                                                                                                                                                          | Survival                                                         | Hazard ratio                           | P=NS                                                                                                                                                             |
| Salomaa, <sup>18</sup> 2005        |                        | First visit to a specialist to treatment (≥ median time and < median time)                                                                                                                          | Survival                                                         | Hazard ratio                           | 0.84 (0.52 to 1.34)                                                                                                                                              |



## References:

1. Annakkaya AN, Arbak P, Balbay O, et al. Effect of symptom-to-treatment interval on prognosis in lung cancer. *Tumori* 2007; 93:61-67
2. Aragonese FG, Moreno N, Leon P, et al. Influence of delays on survival in the surgical treatment of bronchogenic carcinoma. *Lung Cancer* 2002; 36:59-63
3. Berthelet E, Truong PT, Lesperance M, et al. Examining time intervals between diagnosis and treatment in the management of patients with limited stage small cell lung cancer. *American Journal of Clinical Oncology* 2006; 29:21-26
4. Bozcuk H, Martin C. Does treatment delay affect survival in non-small cell lung cancer? A retrospective analysis from a single UK centre. *Lung Cancer* 2001; 34:243-252
5. Bryant AS, Cerfolio RJ. Differences in outcomes between younger and older patients with non-small cell lung cancer. *Ann Thorac Surg* 2008; 85:1735-1739; discussion 1739
6. Buccheri G, Ferrigno D. Lung cancer: clinical presentation and specialist referral time. *Eur Respir J* 2004; 24:898-904
7. Comber H, Cronin DP, Deady S, et al. Delays in treatment in the cancer services: impact on cancer stage and survival. *Irish Medical Journal* 2005; 98:238-239
8. Gould MK, Ghaus SJ, Olsson JK, et al. Timeliness of care in veterans with non-small cell lung cancer. *Chest* 2008; 133:1167-1173
9. Kanashiki M, Satoh H, Ishikawa H, et al. Time from finding abnormality on mass-screening to final diagnosis of lung cancer. *Oncology Reports* 2003; 10:649-652
10. Kashiwabara K, Koshi S, Ota K, et al. Outcome in patients with lung cancer found retrospectively to have had evidence of disease on past lung cancer mass screening roentgenograms. *Lung Cancer* 2002; 35:237-241
11. Kashiwabara K, Koshi S, Itonaga K, et al. Outcome in patients with lung cancer found on lung cancer mass screening roentgenograms, but who did not subsequently consult a doctor. *Lung Cancer* 2003; 40:67-72
12. Liberman M, Liberman D, Sampalis JS, et al. Delays to surgery in non-small-cell lung cancer. *Can J Surg* 2006; 49:31-36
13. Loh LC, Chan LY, Tan RY, et al. Time delay and its effect on survival in malaysian patients with non-small cell lung carcinoma. *Malays J Med Sci* 2006; 13:37-42
14. Myrdal G, Lambe M, Hillerdal G, et al. Effect of delays on prognosis in patients with non-small cell lung cancer. *Thorax* 2004; 59:45-49
15. Pita-Fernandez S, Montero-Martinez C, Pertega-Diaz S, et al. Relationship between delayed diagnosis and the degree of invasion and survival in lung cancer. *Journal of Clinical Epidemiology* 2003; 56:820-825
16. Quarterman RL, McMillan A, Ratcliffe MB, et al. Effect of preoperative delay on prognosis for patients with early stage non-small cell lung cancer. *Journal of Thoracic and Cardiovascular Surgery* 2003; 125:108-114
17. Ringbaek T, Borgeskov S, Lange P, et al. Diagnostic and therapeutic process and prognosis in suspected lung cancer. *Scandinavian Cardiovascular Journal* 1999; 33:337-343
18. Salomaa ER, Sallinen S, Hiekkanen H, et al. Delays in the diagnosis and treatment of lung cancer. *Chest* 2005; 128:2282-2288
